# Supplementary material for: Multi-breed host rumen epithelium transcriptome and microbiome associations and their relationship with beef cattle feed efficiency
Source: PubMed Central journal article supplement (PMC10533831; doi:10.1038/s41598-023-43097-8), 2023-09-27
Supplement: 41598_2023_43097_MOESM1_ESM.pdf [file 41598_2023_43097_MOESM1_ESM.pdf]

Downregulated in low-RFI

Upregulated in low-RFI

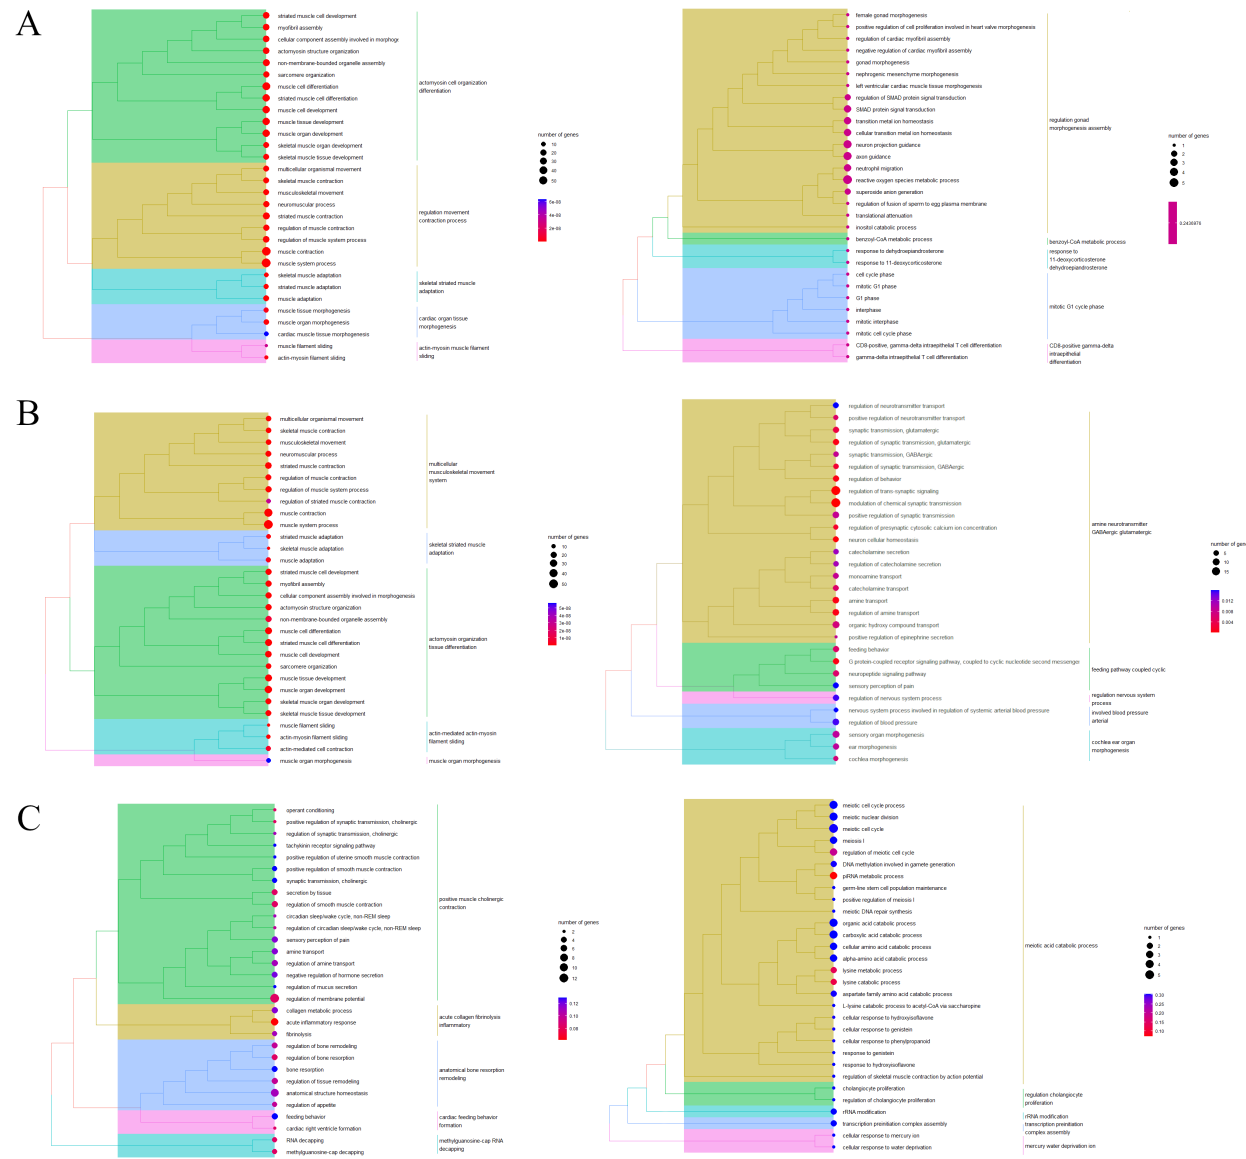

**Supplementary Figure 1:** Functional grouping of annotated gene ontology terms for up (right-hand side) and downregulated (left-hand side) genes in low-RFI groups for Angus (A), Kinsella (B) and Charolais (C) breeds.
