# Supplementary material for: Multi-breed host rumen epithelium transcriptome and microbiome associations and their relationship with beef cattle feed efficiency
Source: PubMed Central journal article supplement (PMC10533831; doi:10.1038/s41598-023-43097-8), 2023-09-27
Supplement: 41598_2023_43097_MOESM2_ESM.pdf [file 41598_2023_43097_MOESM2_ESM.pdf]

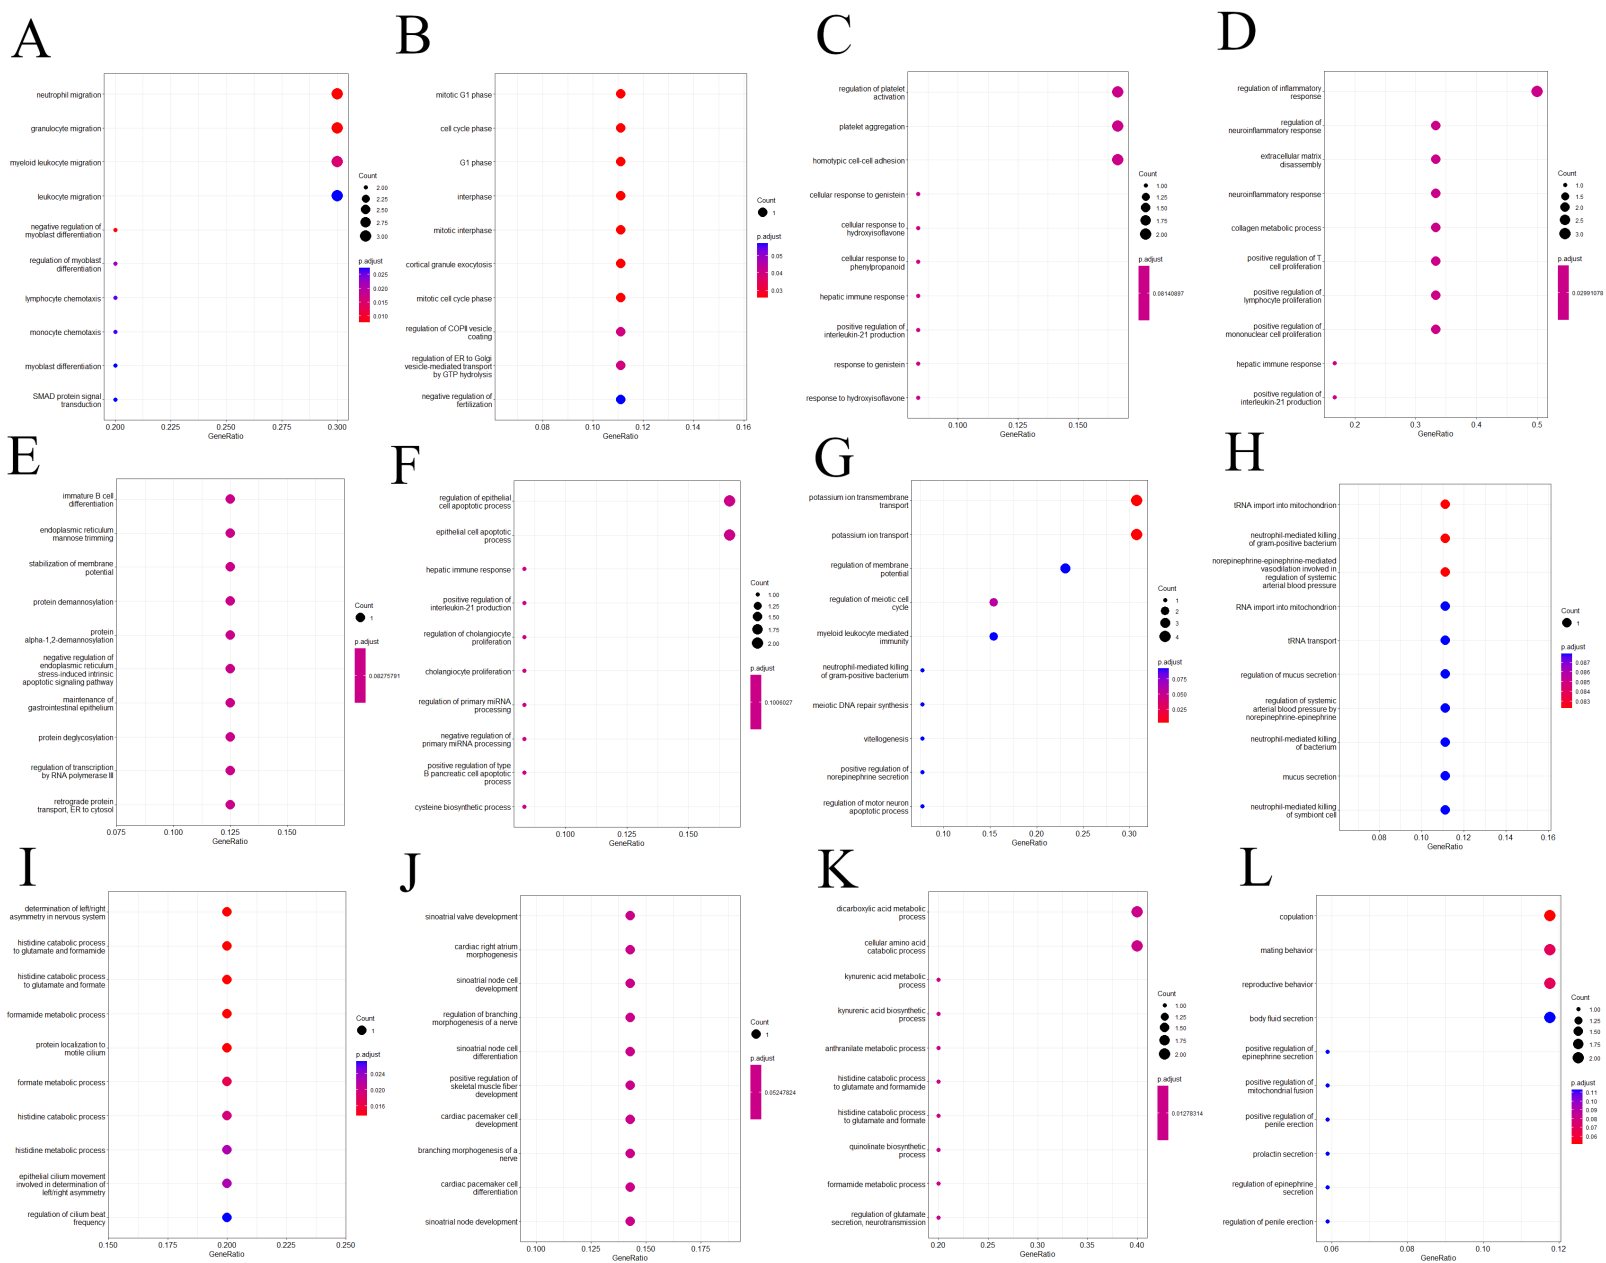

**Supplementary Figure 2:** Top 10 enriched gene ontology terms for the genes significantly correlated with *Ruminococcus 1* (A) and *Bacteroidales RF16* group (B) in Angus; *Erysipelotrichaceae UCG-004* (C), *Oribacterium* (D), *Prevotellaceae UCG-001* (E), *Clostridiales Family XIID* (F), and *Clostridiales vadinBB60* (G) in Charolais; and *Christensenellaceae R-* group (H), *Ruminococcus 1* (I), *Papillibacter* (J), *Ruminococcus gausvareuii* group (K), and *Prevotellaceae UCG-001* (L) in Kinsella.
